# Supplementary material
Source: PubMed Central journal article supplement (PMC8456992)
Supplement: NIHMS1068378-supplement-Supplemental_Material.pdf [file NIHMS1068378-supplement-Supplemental_Material.pdf]

## Supplemental Material

Coding scheme for responses given on the alternative uses task.

Please read each response and rate the responses on the following scales. For each scale, answer without deliberating on your response (i.e. go with your gut).

### 1) Adverb/conjunction vs. verb

Some responses will be given in such a way that the action is described as an analogy with the adverb/conjunction ‘as’ or ‘like’; for example, “Use a brick as a doorstop,” or “Use a brick like an instrument.” Others will be written with a verb; for example, “Use a brick to smash a window.”

*Please rate ‘1’ if the response is an analogy and ‘0’ if it contains a verb.*

### 2) Whole object vs. object part

Some responses will be given in such a way that the action describes using the entire object; for example, “Use a chair to smash a window.” Others will be written in such a way that only a part of the object is used; for instance “Use the leg of the chair to dig in dirt.”

*Please rate ‘1’ if the response describes the whole object and a ‘0’ if it describes a part of the object.*

### 3) Same action vs. different action

Some responses will be given in such a way that the action described is the same as the action that would be used for the object's common use. For instance, a hammer is commonly used with a hammering action, and so "Use a hammer to smash a window" describes the same action. Alternatively, "Use a hammer to roll dough" describes an action that is different from the common use.

*Please rate a '1' if the action is the same and a '0' if the action is different.*

### 4) Egocentric vs. allocentric perspective

Some responses will be given in such a way that the action is described from a first person, egocentric perspective; for instance, "Use a hammer to support my weight like a cane." Others will be written from a third person, allocentric perspective; for instance, "Use a hammer to tenderize meat."

*Please rate a '1' if the action described from the first person perspective and '0' if the action is described from a third person perspective.*

### 5) Concrete vs. abstract action verbs

Some responses will be given in such a way that the action is very concrete, clearly specified, or easy to imagine. That is, you can very clearly and easily image yourself using a specific action to achieve the goal; for instance, "Use a hammer to hammer a nail." Others will be written in such a way that the action is more abstract, under- specified, and difficult to imagine, or there may be multiple actions that support the goal; for instance "Use a hammer to make art."

*Please rate a '1' if the action described is more concrete and '0' if the action described is more abstract.*

6). True novel use vs. familiar use

Some responses will be given that reflect, in your opinion, a true uncommon use; something novel. For instance, “Use an axe to climb a tree.” Others will be given that reflect, in your opinion, a *commonly reported* or a *familiar* uncommon use; for instance, “Use lipstick to write on paper”.

*Please rate a '1' if the description reflects a true novel use and a '0' if the description reflects a familiar use.*

7) Amount of arm movement

Some responses will be given that reflect complex movements that differ in the degree to which the arm is involved. For instance, “Use a hammer to smash a window” implicates substantial arm motion, whereas “Use a tweezers to pick up bugs” primarily involves motion in the fingers.

*Please rate a '1' the action involves substantial motion throughout the whole arm and a '0' if the action primarily involves motion in the fingers.*

8) Surface area of the hand

Some responses will be given that reflect complex movements that differ in the degree to which the surface area of the hand is involved. For instance, “Use a hammer to smash a window” implies that the full surface area of the hand touches the tool while “Use tweezers to pick up bugs” implicates only a small part of the hand that touches the tool.

*Please rate a '1' if the full surface area of the hand touches the tool and a '0' if only a small part of the hand touches the tool.*

9) Toward/away from the body

Some responses will be given that reflect complex movements that are made towards the body; for instance, "Use a hammer to brush my hair." Others will movements away from the body or actions out in space; for instance, "Use an axe to climb a tree."

*Please rate a '1' if the tool is used on/near the body and a '0' if the tool is used far out in space.*

10) Memory use production

Retrieval from memory of alternative uses, either unmediated, without mention of specific memories or mediated ("A tire could be used as a floatation aid"), or with specific reference to prior knowledge acquired through direct or indirect experience ("I remember my father used a brick to stop a car rolling away").

*Please rate a '1' if the response was based on memory retrieval and '0' if not.*

11) Property use production

Retrieving and scanning properties of the object and then using these properties as cues to retrieve uses which require those properties, such as "Bricks are heavy" or "A pencil is sharp so can be used to poke holes in paper".

*Please rate a '1' if the response is based on property use and a '0' if not.*

12) Broad based use production

Reviewing object against a number of broad uses, such as “A barrel could be used as part of a work of art”, “A brick could be used for building walls, paths, roads, channels for water”, or “Could a barrel be used as a kind of transport? Yes, you could float things in it down a river”.

*Please rate a ‘1’ if the response is based on a broad usage and a ‘0’ if not.*

13) **Disassembly use production**

Imagining disassembling the object and using parts or recombining parts, such as “Remove laces from shoe and use them to tie your hair up”

*Please rate a ‘1’ if the response is based on disassembly of the object and a ‘0’ if not.*
